# Supplementary material
Source: PubMed Central journal article supplement (PMC2584731)
Supplement: 0809814105_0809814105SI.pdf [file 0809814105_0809814105SI.pdf]

# Supporting Information

Zajonc *et al.* 10.1073/pnas.0809814105

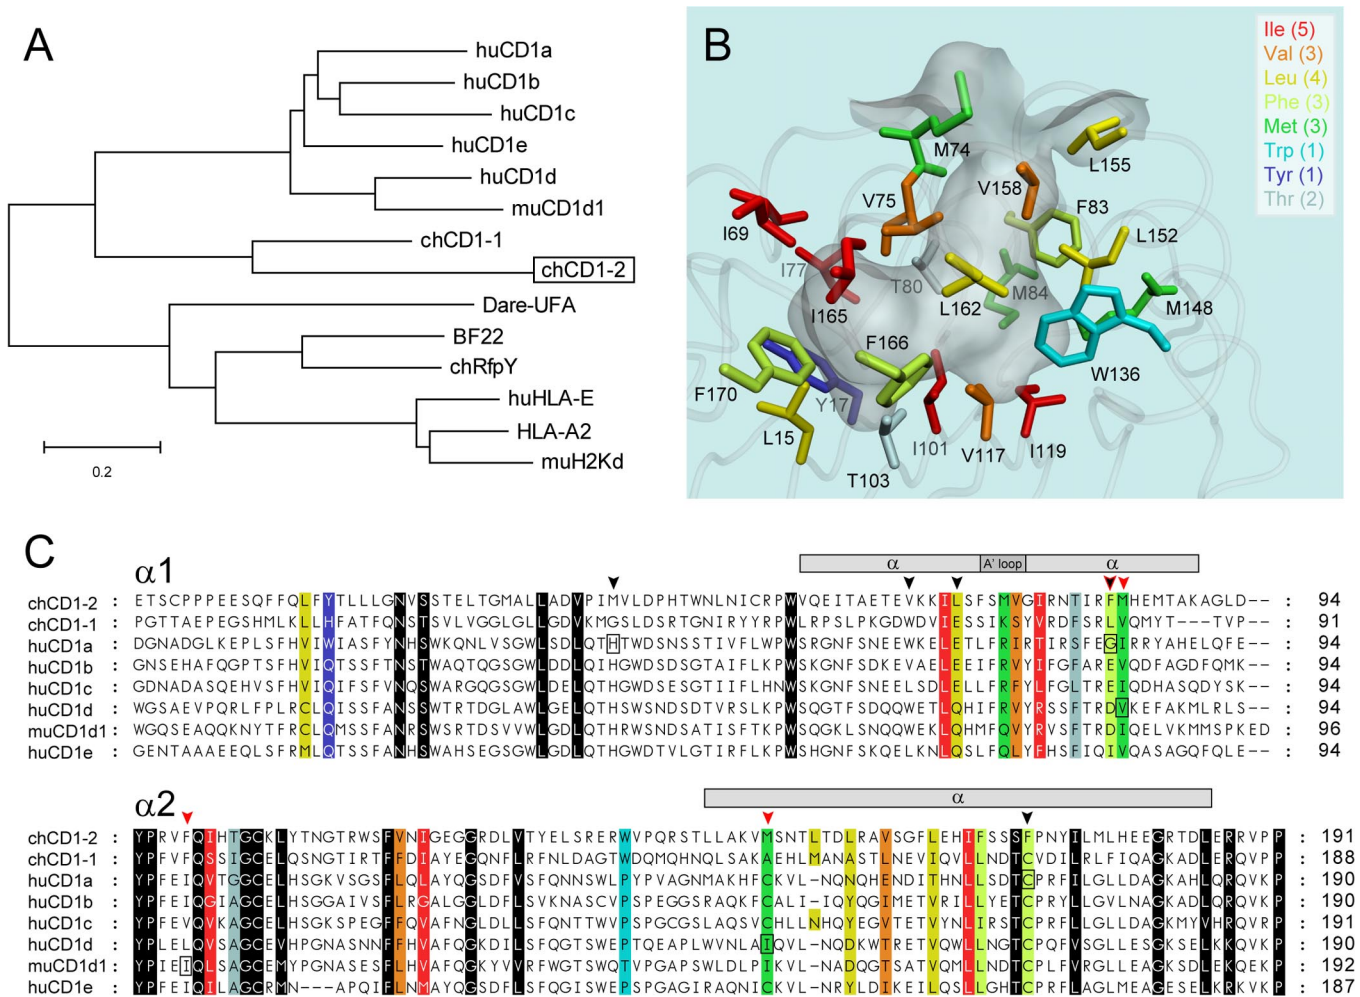

**Fig. S1.** CD1 sequence alignment and groove amino acid composition. (A) Relationship of chCD1 proteins to avian and mammalian non-classical and classical MHC molecules. (B) Chicken CD1-2-binding groove close-up (gray) with groove-forming residues colored by amino acid type as shown in the inset. The outer molecular surface of CD1-2 is removed for clarity. (C) Sequence alignment between chicken, mouse, and human CD1s. Identical or highly similar residues are indicated by black bars. Residues that form the chCD1-2-binding groove are colored as in B. The black arrows indicate chCD1-2 residues that were mutated to form the CD1a-like binding groove illustrated in Fig. 5 A and B. Red arrows indicate mutations resulting in the CD1d-like groove.

**Table S1. Data collection and refinement statistics for chCD1-2**

|                                                 |                       |
|-------------------------------------------------|-----------------------|
| Data collection                                 |                       |
| Resolution range (Å)                            | 30.0–2.0 (2.07–2.00)* |
| Completeness (%)                                | 93.2 (95.6)           |
| Number of unique reflections                    | 26,874                |
| Redundancy                                      | 4.1                   |
| R <sub>sym</sub> <sup>†</sup> (%)               | 8.2 (64.9)            |
| I/σ <sub>1</sub>                                | 23.0 (2.0)            |
| Refinement statistics                           |                       |
| Number of reflections (F > 0)                   | 26,843                |
| Maximum resolution (Å)                          | 2.0                   |
| R <sub>cryst</sub> <sup>‡</sup> (%)             | 21.6 (25.0)           |
| R <sub>free</sub> <sup>§</sup> (%)              | 26.6 (27.0)           |
| Number of atoms                                 |                       |
| Protein                                         | 3,214                 |
| Palmitic acid                                   | 3,005                 |
| N-linked carbohydrates                          | 18                    |
| Water                                           | 42                    |
| Ramachandran statistics (%)                     |                       |
| Favored                                         | 96.3                  |
| Allowed                                         | 3.7                   |
| Root-mean-square deviation from ideal geometry  |                       |
| Bond length (Å)                                 | 0.015                 |
| Bond angles (°)                                 | 1.6                   |
| Average B values (Å <sup>2</sup> ) <sup>¶</sup> |                       |
| Protein                                         | 52.5                  |
| Palmitic acid                                   | 66.1                  |
| Water molecules                                 | 48.7                  |
| Carbohydrates                                   | 92.4                  |

\*. Number in parentheses refer to the highest resolution shell.

<sup>†</sup>,  $R_{sym} = (\sum_h \sum_i |I_i(h) - \langle I(h) \rangle| / \sum_h \sum_i I_i(h)) \times 100$ , where  $\langle I(h) \rangle$  is the average intensity of  $i$  symmetry-related observations for reflections with Bragg index  $h$ .

<sup>‡</sup>,  $R_{cryst} = (\sum_{hkl} |F_o - F_c| / \sum_{hkl} F_o) \times 100$ , where  $F_o$  and  $F_c$  are the observed and calculated structure factors, respectively, for all data.

<sup>§</sup>,  $R_{free}$  calculated as for  $R_{cryst}$ , but on 4% of data excluded from refinement.

<sup>¶</sup>, B values were calculated with the CCP4 program TLSANL [Howlin B, Butler DS, Moss DS, Harris GW, Driessen HPC (1993) TLSANL: TLS parameter analysis program for segmented anisotropic refinement of macromolecular structures. *J Appl Cryst* 26:622–624.]

**Table S2. Percent identity of chCD1–2 to MHC and CD1**

| Protein (PDB code) | Species | $\alpha 1-\alpha 2$ | $\alpha 1-\alpha 3$ |
|--------------------|---------|---------------------|---------------------|
| chCD1–1            | Chicken | 23                  | 48                  |
| huCD1a (1ONQ)      | Human   | 16                  | 24                  |
| huCD1b (1GZQ)      | Human   | 19                  | 25                  |
| muCD1d (1CD1)      | Mouse   | 17                  | 23                  |
| chBF2*21 (3BEW)    | Chicken | 11                  | 22                  |
| HLA-E (1MHE)       | Human   | 14                  | 19                  |
